# Supplementary material for: On the structure of hybrid water-in-salt electrolytes
Source: Royal Society of Chemistry journal article supplement (doi:10.1039/d5cp00680e), 2025-01-01
Supplement: d5cp00680e1.pdf [file d5cp00680e1.pdf]

## Supplementary Information for: On the structure of hybrid water-in-salt electrolytes

Raúl Lois-Cuns<sup>a,b,‡</sup>, Antía Santiago-Alonso<sup>a,b,c,‡</sup>, Martín Otero-Lema<sup>a,b</sup>, Juan J. Parajó<sup>a,b</sup>, Josefa Salgado<sup>a,b</sup>, Hadrián Montes-Campos<sup>\*,a,b</sup>, Trinidad Méndez-Morales<sup>\*,a,b</sup>, and Luis M. Varela<sup>a,b</sup>

<sup>a</sup> Grupo de Nanomateriais, Fotónica e Materia Branda, Departamento de Física de Partículas - Universidade de Santiago de Compostela, Campus Vida s/n E-15782, Santiago de Compostela, Spain. E-mail: hadrian.montes@usc.es, trinidad.mendez@usc.es

<sup>b</sup> Instituto de Materiais (iMATUS) - Universidade de Santiago de Compostela, Avenida do Mestre Mateo 25 E-15782, Santiago de Compostela, Spain.

<sup>c</sup> ABCR LABORATORIOS, Lg. Vilapouca (PG Industrial) E-36550, Forcarei, Spain.

## Materials and methods

### Experimental mixtures

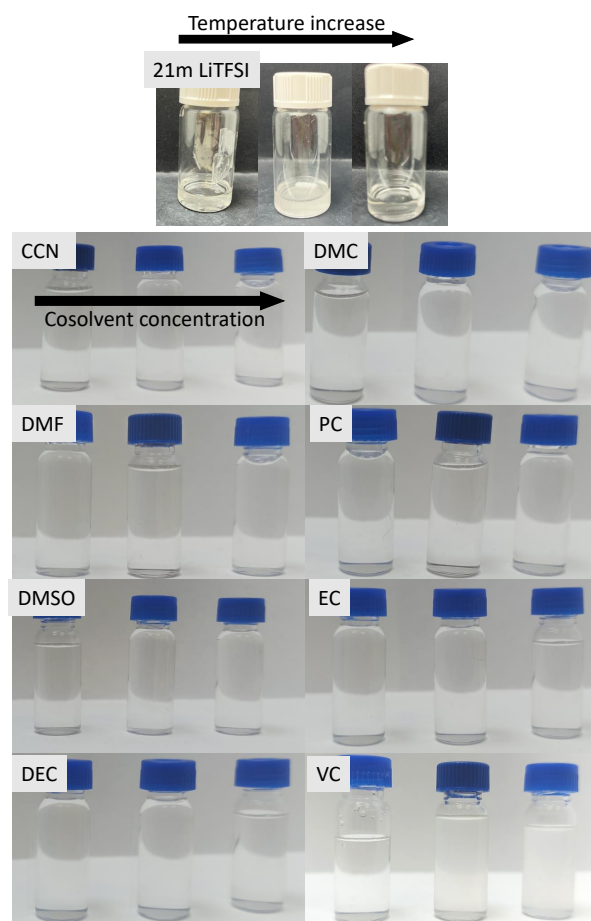

**Figure S1** Pictures of all the experimental mixtures after one month. All the samples were kept at room temperature. Notably, the melting point of pure WiS is very close to room temperature, allowing for the formation of crystals upon deposition. Once it absorbs a small amount of heat from the environment, for exempling by handling the mixture, WiS melts completely. This process could be observed at the top of the figure as the temperature is slightly increased.

<sup>‡</sup> These authors contributed equally to this work.

## Simulation parameters

When selecting a suitable water model, various models were evaluated to determine which one most accurately replicates the experimental properties of the 21 m WiS electrolyte. The water models tested included TIP3P<sup>1</sup>, TIP4P<sup>1</sup>, TIP5P<sup>2</sup>, SPC<sup>3</sup>, SPC/E<sup>3</sup>, and OPC3<sup>4</sup>. Ion charges were scaled by a factor 0.8. Experimental measurements of density and diffusion coefficients of the species of the system were chosen as the key parameters for comparison. Table S1 presents the density results, while Fig. S2 illustrates the comparison of diffusion coefficients.

| Water model  | Density [g/cm <sup>3</sup> ] |
|--------------|------------------------------|
| TIP3P        | 1701.72                      |
| TIP4P        | 1731.16                      |
| TIP5P        | 1780.94                      |
| SPC          | 1707.20                      |
| SPC/E        | 1717.95                      |
| OPC3         | 1721.57                      |
| Experimental | 1724.00 <sup>5</sup>         |

**Table S1** Density values for 21 m LiTFSI WiS electrolyte for different water models.

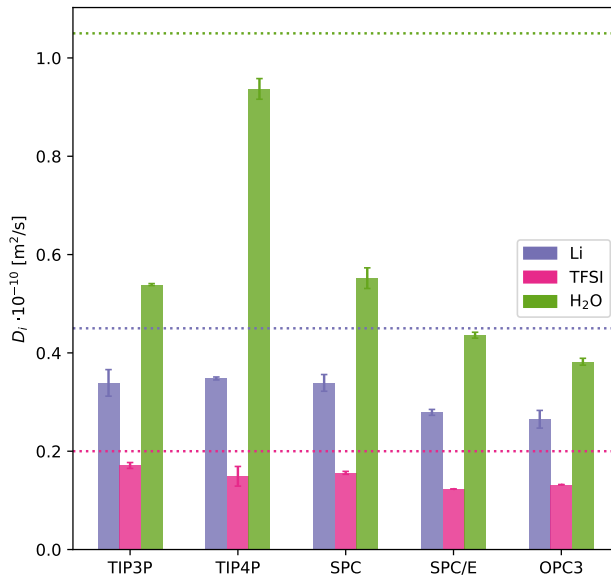

**Figure S2** Diffusion coefficients for the cation, anion and water molecules for the different models. Dotted lines represent experimental values used for comparison<sup>6</sup>.

The parametrization for the ACN molecule is shown in Table S2.

|    | m [a.u] | q [e]  | $\sigma$ [Å] | $\epsilon$ [kJ/mol] |
|----|---------|--------|--------------|---------------------|
| C1 | 12.0110 | -0.080 | 3.3          | 0.276144            |
| C2 | 12.0110 | 0.460  | 3.3          | 0.276144            |
| N3 | 14.0067 | -0.560 | 3.2          | 0.711280            |
| H  | 1.00800 | 0.060  | 2.5          | 0.062760            |

**Table S2** Parameters for the atoms in the ACN molecule. C2 denotes the carbon bonded to the nitrogen atom, while the C1 carbon atom is bonded to three identical hydrogen atoms, as well as to the C1 carbon.

# Results and discussion

## X-ray structure factor

Taking atomic form factors into account, the X-ray structure factor is given by

$$S^X(q) = \frac{1}{\sum_{\alpha} x_{\alpha} f_{\alpha}^2(q)} \sum_{\alpha}^n \sum_{\beta}^n f_{\alpha}(q) f_{\beta}(q) S_{\alpha\beta}(q), \quad (1)$$

where  $S_{\alpha\beta}$  is the partial structure factor between atomic species  $\alpha$  and  $\beta$ ,  $x_{\alpha}$  is the molar fraction of the element  $\alpha$  and  $f_{\alpha}$  its form factor for X-ray scattering. The atomic form factors were taken from the International Tables for Crystallography<sup>7</sup>. The X-ray structure factors for all systems can be found in Fig. S3.

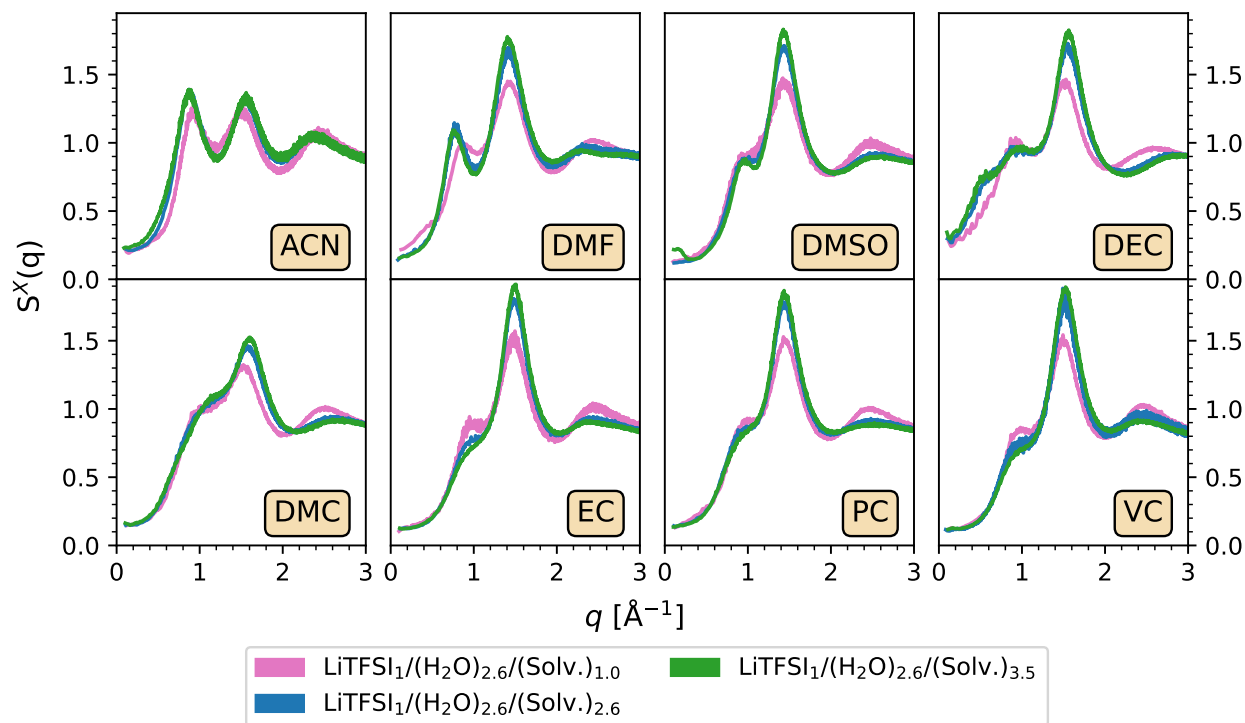

**Figure S3** Computational X-ray structure factors  $S^X(q)$  as a function of the wave vector modulus  $q$  for the different concentrations of the co-solvents.

## Partial structure factors

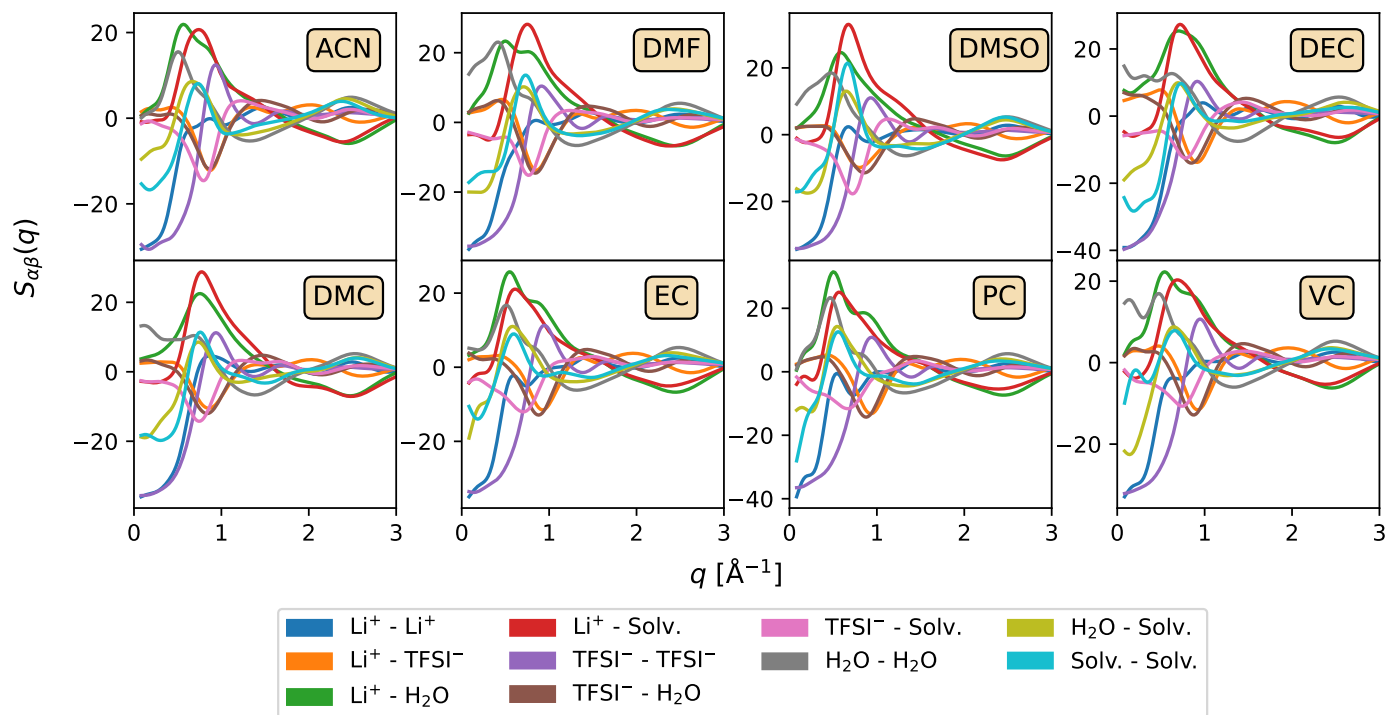

**Figure S4** Partial structure factors  $S_{\alpha\beta}(q)$  as a function of the wave vector modulus  $q$  for the  $\text{LiTFSI}_1/(\text{H}_2\text{O})_{2.6}/(\text{Solv})_{1.0}$  systems.

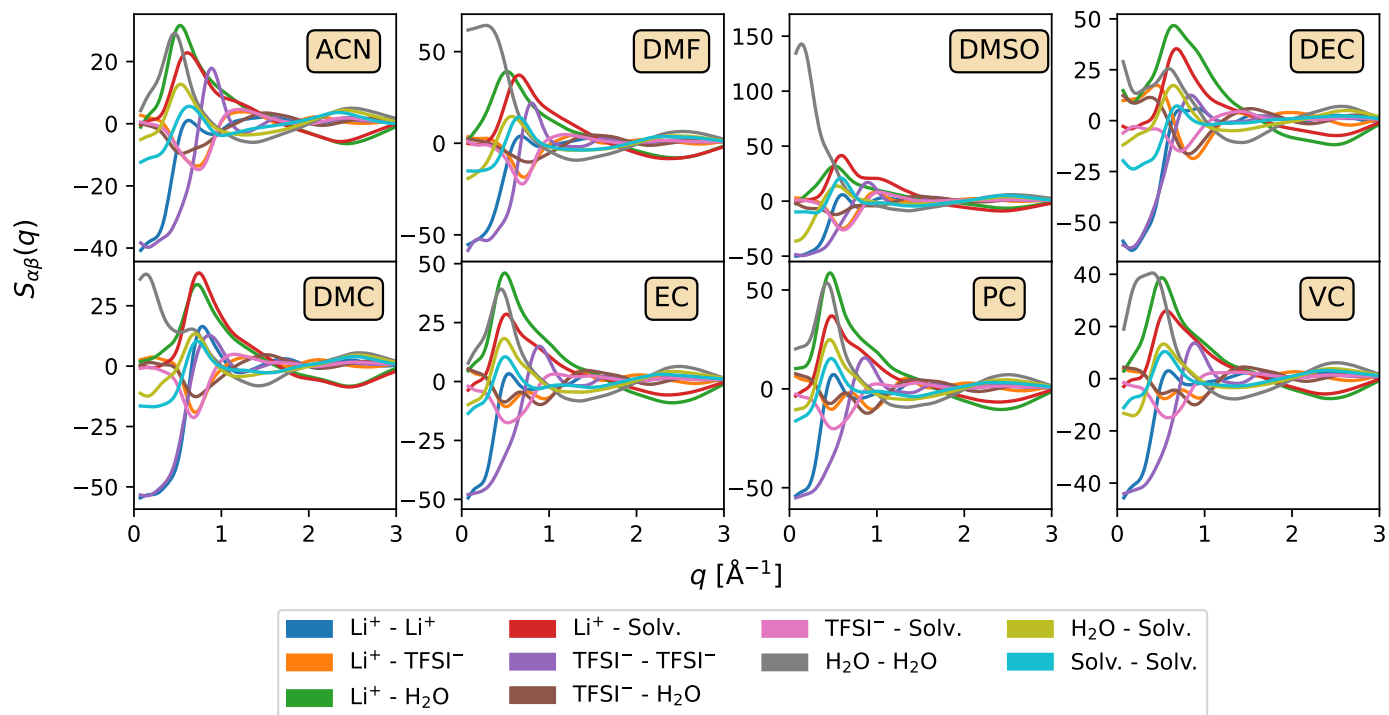

**Figure S5** Partial structure factors  $S_{\alpha\beta}(q)$  as a function of the wave vector modulus  $q$  for the  $\text{LiTFSI}_1/(\text{H}_2\text{O})_{2.6}/(\text{Solv})_{2.6}$  systems.

## Water cluster population

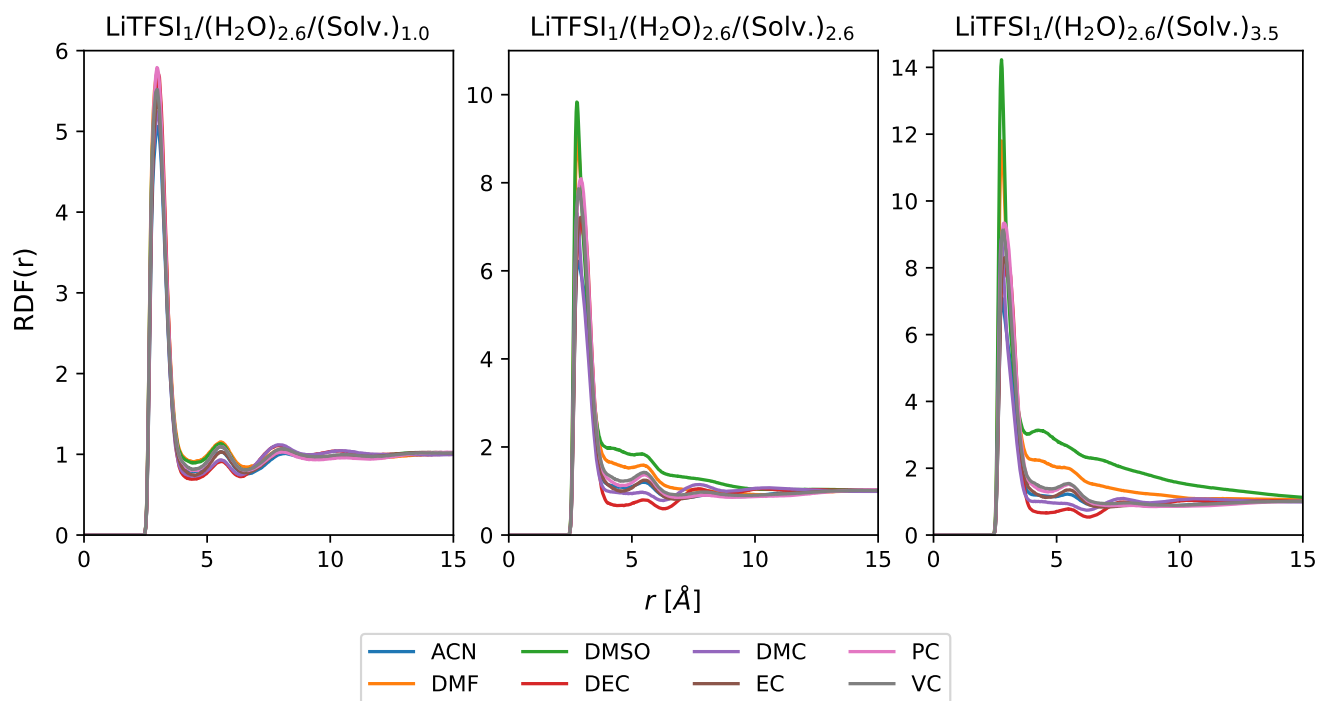

**Figure S6** Radial distribution functions between the oxygen atom of water molecules for the different co-solvent mole fractions (increasing from top to bottom).

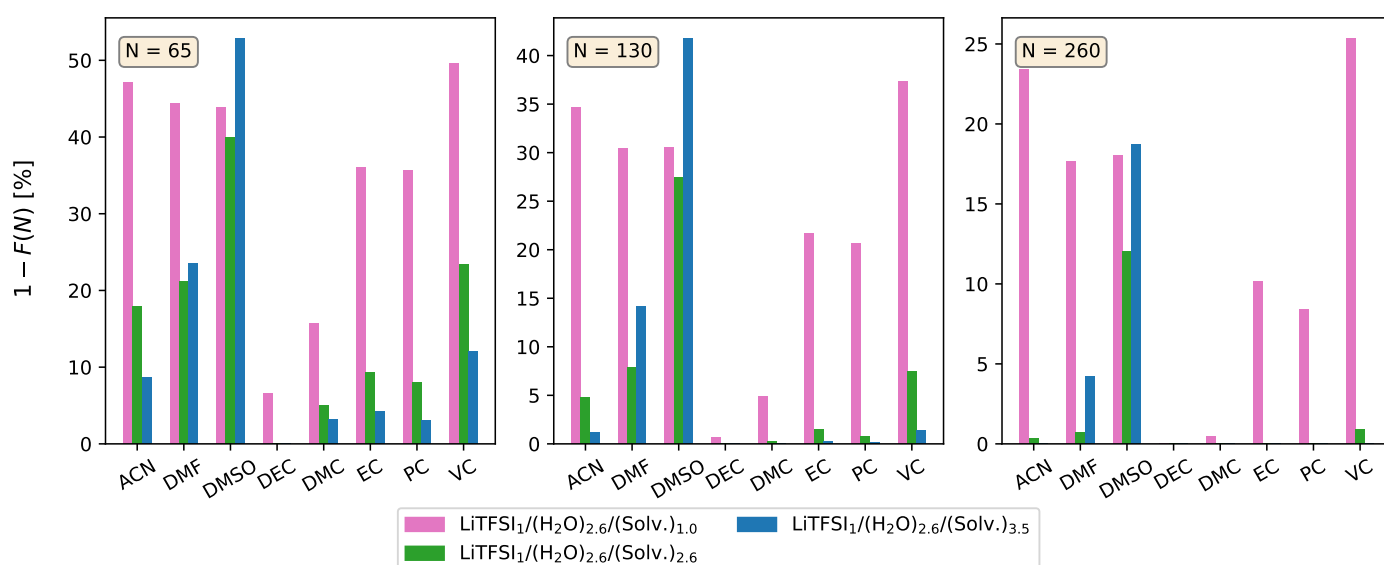

**Figure S7** Fraction of water molecules that belong to a cluster with at least  $N$  water molecules, for different values of  $N$ . These values represent 2.5%, 5.0% and 10.0% of the total water molecules inside the simulation boxes.

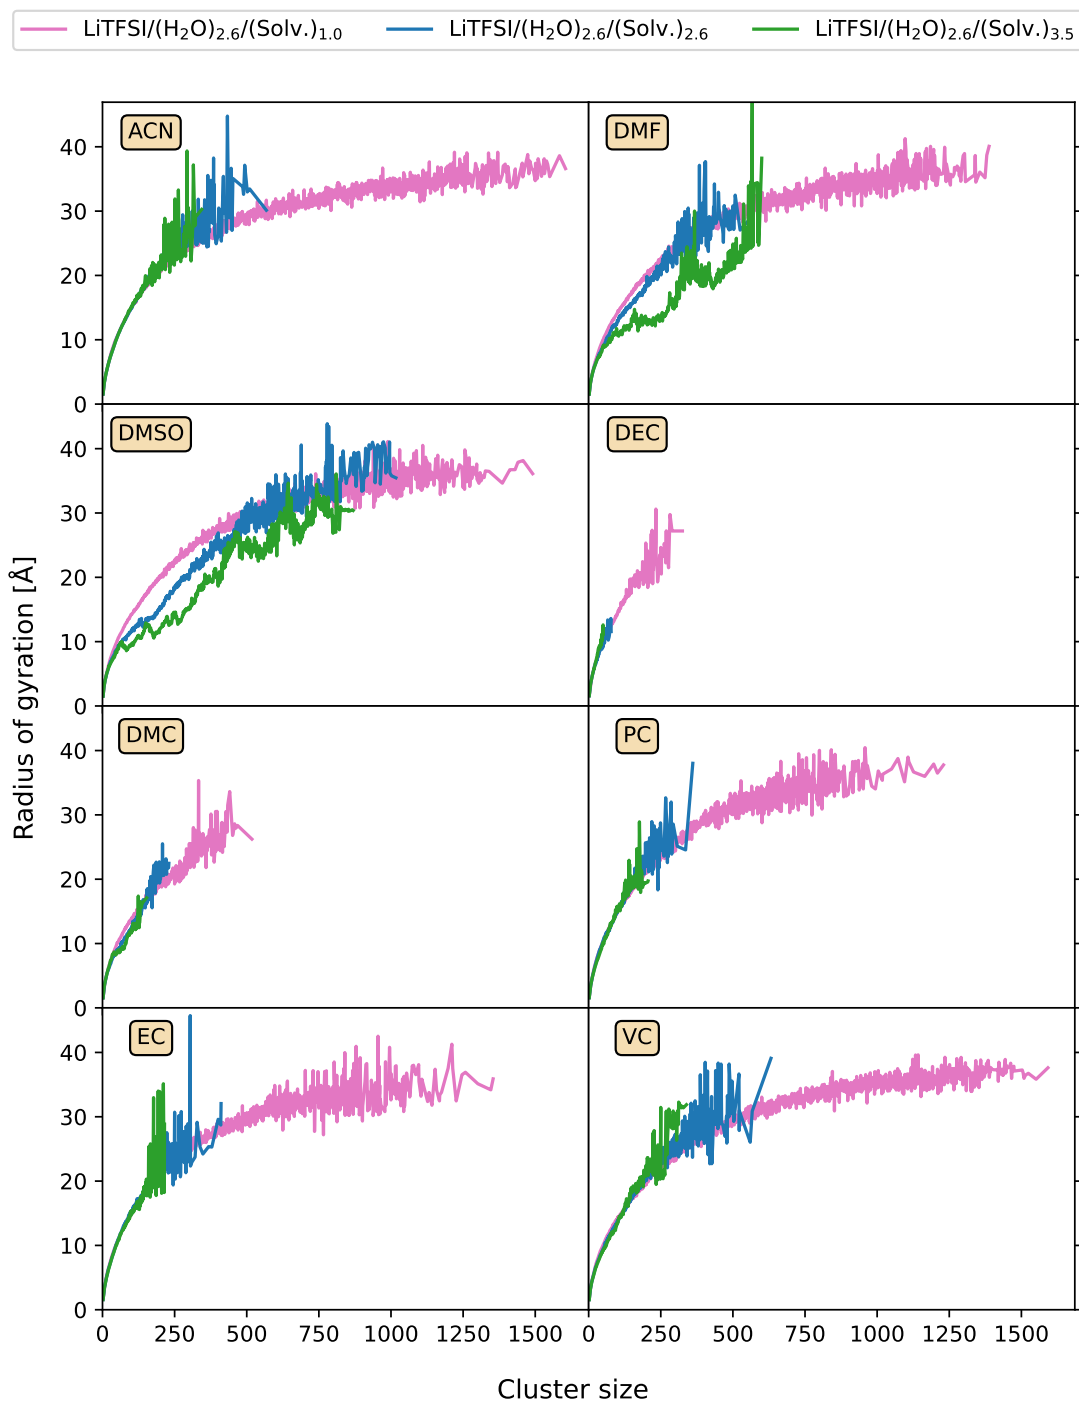

**Figure S8** Radius of gyration for the different cluster size and systems.

## Nuclear Magnetic Resonance

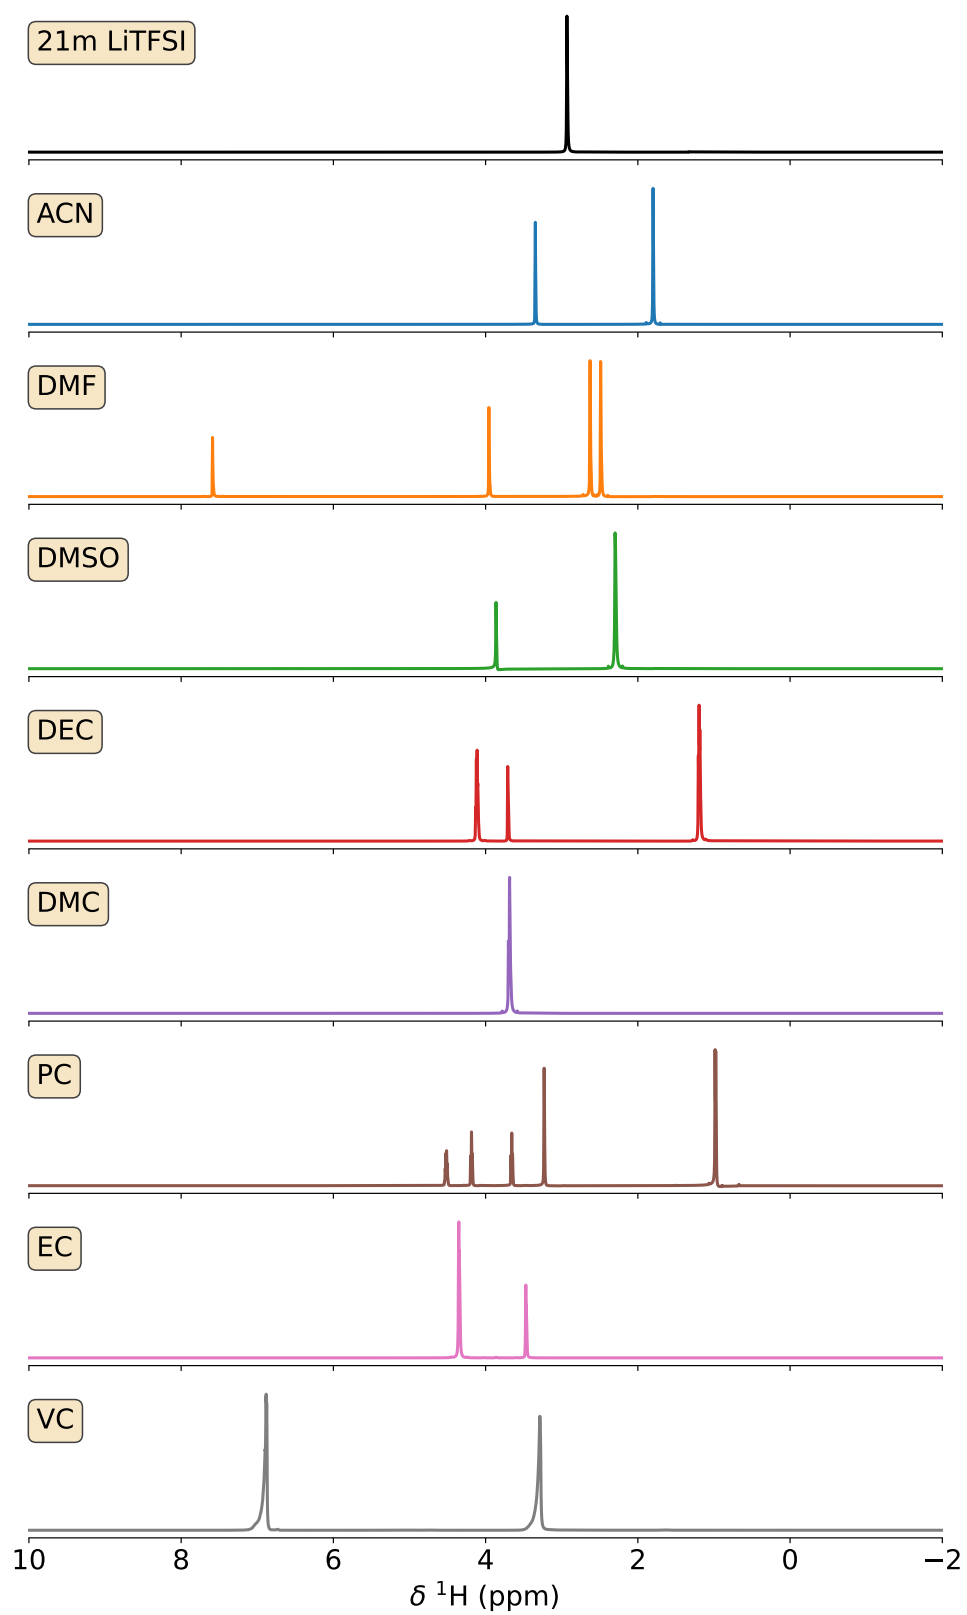

**Figure S9** Normalized NMR measurements spectra of  $\text{LiTFSI}_1/(\text{H}_2\text{O})_{2.6}/(\text{Solv})_{3.5}$  electrolytes showing the  $^1\text{H}$  chemical shift.

## Chemical shift models

Two different models are used to compare the  $\delta^1H$  chemical shift of water molecules with the fractions of water involved in  $Li^+$  coordination (and, therefore, the “free water fraction”). The first one is a two contribution model described by:

$$\delta^1H = \delta^1H_{WiS} \cdot f + \delta^1H_w \cdot (1 - f) = 4.7 \cdot f + 2.93 \cdot (1 - f) \quad (2)$$

where  $f$  is the fraction of water molecules that are found in the first solvation shell of  $Li^+$  cations and  $\delta^1H_{w/WiS}$  are the experimental values corresponding to the  $^1H$  chemical shift of water molecules for the pure-water/WiS systems.

A three contribution model that takes into account the cosolvent-water interactions is also considered:

$$\delta^1H = \delta^1H_{WiS} \cdot f + \delta^1H_w \cdot f' + \delta^1H_{sw} \cdot (1 - f - f') \quad (3)$$

where now  $f'$ , which represents the free water fraction, corresponds to the water molecules that have more water molecules in their solvation shell than cosolvent molecules and  $\delta^1H_{sw}$  represents the shift of water molecules in cosolvent media.

To compute the value of  $\delta^1H_{sw}$ , density functional theory (DFT) simulations were carried out. Different complexes composed by one water molecule surrounded by four cosolvent molecules, whose geometries were optimized, were used to compute the NMR spectra by means of the gauge-independent atomic orbital (GIAO) method. To properly take into account the solvent effects, the polarizable continuum model (PCM) was used. The static dielectric constants and optical dielectric constants for the cosolvent used during these simulations are listed in the table below.

| System | $\epsilon_r$ | $n^2$    |
|--------|--------------|----------|
| ACN    | 36.64        | 1.800687 |
| DMF    | 38.25        | 2.046330 |
| DMSO   | 47.24        | 2.185371 |
| DEC    | 2.820        | 1.915456 |
| DMC    | 3.087        | 1.876078 |
| PC     | 66.14        | 2.013277 |
| EC     | 89.78        | 2.001659 |
| VC     | 127          | 2.019241 |
| TMS    | 80.1         | 1.846065 |

**Table S3** Static dielectric constant,  $\epsilon_r$ , and, optical dielectric constant,  $n^2$ , for the different solvents used during DFT simulations.

All calculations were performed using Gaussian 16<sup>8</sup>. The initial geometries were optimized at the B3LYP/6-311G(d,p) level of theory, including Grimme’s D3 empirical dispersion correction with Becke–Johnson damping<sup>9</sup>. For the NMR calculations, the WP04 functional was employed, as it is specifically parameterized for accurate proton chemical shift prediction<sup>10</sup>. Additionally, the extended 6-311++G(2d,p) basis set was used to improve the description of electronic environments. For the optimization procedure the converge option was set to Tight and Ultrafine was selected as the integration grid. For the computation of the shift of the  $^1H$  spectra, tetramethylsilane (TMS) was used as reference. Its spectra was computed using the same procedure described above but using only two TMS molecules as input for the computations.

In order to compute the water fractions, for each simulation frame an undirected graph is built, where each node represents metal cations, water molecules or cosolvent molecules. One water molecule node is connected to any of the other nodes if any of the atoms of one molecule is at a distance of 2.7 Å (which correspond to the first minimum of the minimum-distance distribution functions of water molecules depicted in Fig. S10). From that the different water fractions can be computed looking at the connections of the graph. A water molecule is considered to contribute to the fraction of water molecules that are in the first solvation shell of  $Li^+$  if at least one cation is connected to it. Then, a water molecule contributes to  $f'$  if there are more water molecules connected to it than cosolvent molecules.



# Minimum-distance distribution functions of H<sub>2</sub>O molecules

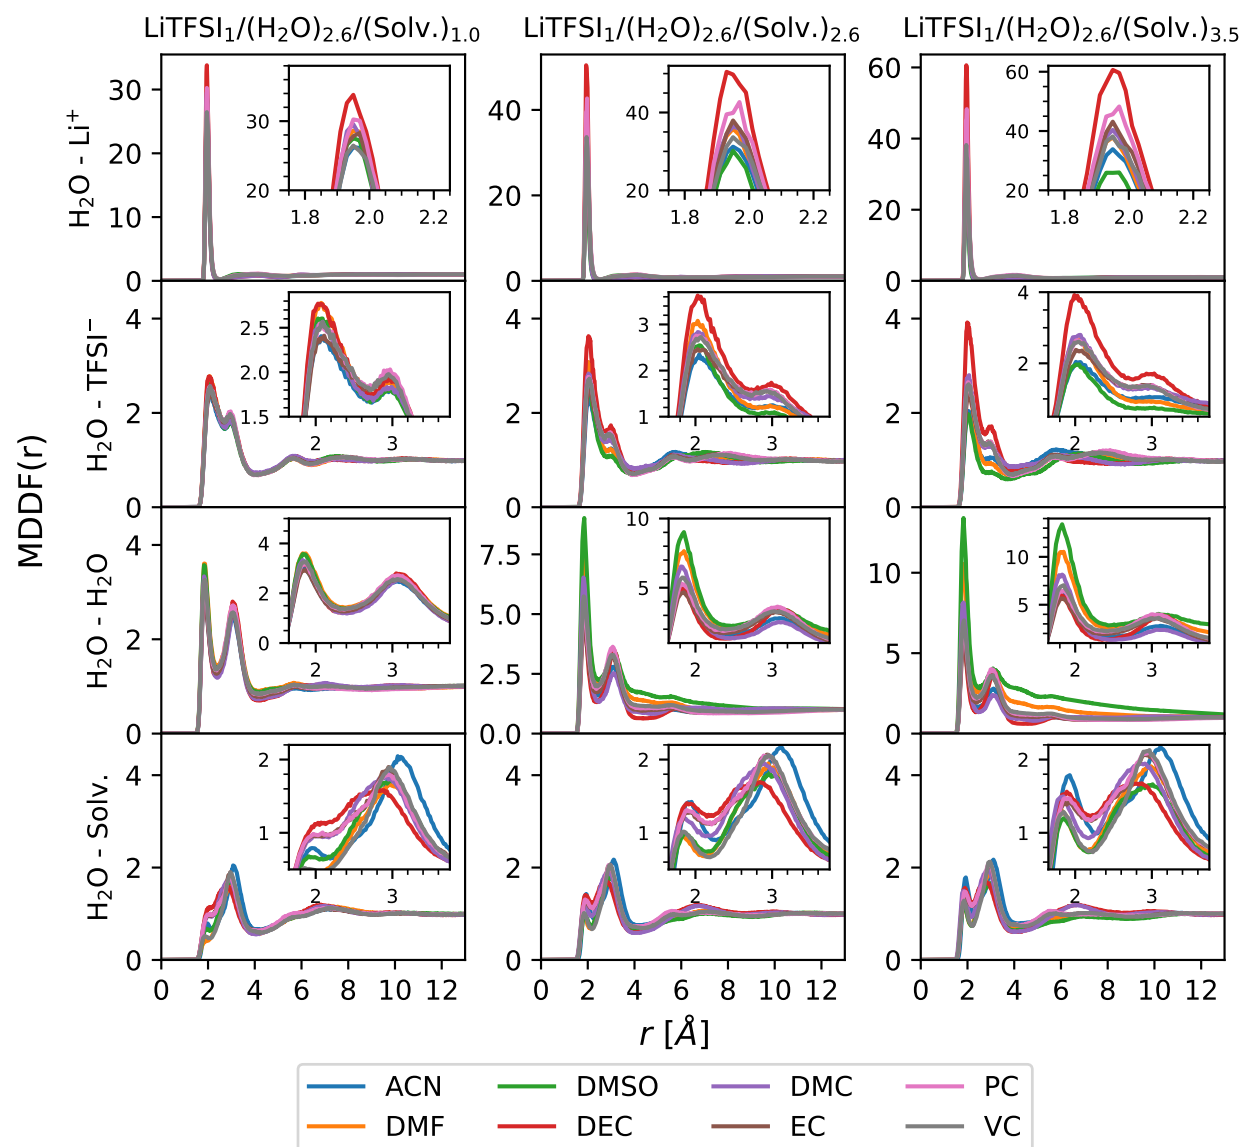

**Figure S10** Minimum-distance distribution functions (MDDFs) between H<sub>2</sub>O molecules and (from top to bottom) Li<sup>+</sup> cations, TFSI<sup>-</sup> anions, H<sub>2</sub>O molecules and co-solvent molecules for the different concentrations (increasing from left to right).

## Notes and references

- [1] W. L. Jorgensen, J. Chandrasekhar, J. D. Madura, R. W. Impey and M. L. Klein, *J. Chem. Phys.*, 1983, **79**, 926–935.
- [2] M. W. Mahoney and W. L. Jorgensen, *J. Chem. Phys.*, 2000, **112**, 8910–8922.
- [3] H. J. C. Berendsen, J. R. Grigera and T. P. Straatsma, *J. Phys. Chem-Us*, 1987, **91**, 6269–6271.
- [4] S. Izadi and A. V. Onufriev, *J. Chem. Phys.*, 2016, **145**, 074501.
- [5] Y. Zhang, N. H. Lewis, J. Mars, G. Wan, N. J. Weadock, C. J. Takacs, M. R. Lukatskaya, H.-G. Steinrück, M. F. Toney, A. Tokmakoff *et al.*, *J. Phys. Chem. B*, 2021, **125**, 4501–4513.
- [6] Y. Zhang and E. J. Maginn, *J. Phys. Chem. B*, 2021, **125**, 13246–13254.
- [7] P. Brown, A. Fox, E. Maslen, M. O’keefe and B. Willis, *International Tables for Crystallography C*, 2006, **C**, 554–595.
- [8] M. J. Frisch, G. W. Trucks, H. B. Schlegel, G. E. Scuseria, M. A. Robb, J. R. Cheeseman, G. Scalmani, V. Barone, G. A. Petersson, H. Nakatsuji, X. Li, M. Caricato, A. V. Marenich, J. Bloino, B. G. Janesko, R. Gomperts, B. Mennucci, H. P. Hratchian, J. V. Ortiz, A. F. Izmaylov, J. L. Sonnenberg, D. Williams-Young, F. Ding, F. Lipparini, F. Egidi, J. Goings, B. Peng, A. Petrone, T. Henderson, D. Ranasinghe, V. G. Zakrzewski, J. Gao, N. Rega, G. Zheng, W. Liang, M. Hada, M. Ehara, K. Toyota, R. Fukuda, J. Hasegawa, M. Ishida, T. Nakajima, Y. Honda, O. Kitao, H. Nakai, T. Vreven, K. Throssell, J. A. Montgomery, Jr., J. E. Peralta, F. Ogliaro, M. J. Bearpark, J. J. Heyd, E. N. Brothers, K. N. Kudin, V. N. Staroverov, T. A. Keith, R. Kobayashi, J. Normand, K. Raghavachari, A. P. Rendell, J. C. Burant, S. S. Iyengar, J. Tomasi, M. Cossi, J. M. Millam, M. Klene, C. Adamo, R. Cammi, J. W. Ochterski, R. L. Martin, K. Morokuma, O. Farkas, J. B. Foresman and D. J. Fox, *Gaussian~16 Revision C.01*, 2016, Gaussian Inc. Wallingford CT.
- [9] S. Grimme, S. Ehrlich and L. Goerigk, *Journal of computational chemistry*, 2011, **32**, 1456–1465.
- [10] K. W. Wiitala, T. R. Hoyer and C. J. Cramer, *Journal of Chemical Theory and Computation*, 2006, **2**, 1085–1092.
